# Supplementary material for: Comparing High-Flow Nasal Cannula and Non-Invasive Ventilation in Critical Care: Insights from Deep Counterfactual Inference
Source: Research Square preprint supplement (doi:10.21203/rs.3.rs-7230866/v1), 2025-08-05
Supplement: Supplementary file 1 [file 72739648908041e89158f7c4.docx]

**Supplementary Materials for “Comparing High-Flow Nasal Cannula and Non-Invasive Ventilation in Critical Care: Insights from Deep Counterfactual Inference”**

Supplementary Table 1. Criteria of clinical labeling scheme of Vent.io model.

| **Condition** | **Criteria** | **Points** |
| --- | --- | --- |
| PaO2/FiO2 (not NaN) | 200PaO2/FiO2300 mmHg | 1 |
| PaO2/FiO2 200 mmHg (severe hypoxemia) | 2 |
| IMV 24 hours | 3 |
| PaO2/FiO2 200 mmHg and IMV <=24 hours | 4 |
| IMV > 24 hours or (IMV 24 hours + mortality) | 5 |
| SpO2/FiO2 (not NaN) | 141PaO2/FiO2221 mmHg | 1 |
| SpO2/FiO2 141 mmHg (severe hypoxemia) | 2 |
| IMV 24 hours | 3 |
| SpO2/FiO2 141 mmHg and IMV 24 hours | 4 |
| IMV > 24 hours or (IMV 24 hours + mortality) | 5 |

Supplementary Table 2. Categories of HFNC and NIV treatments used in the study cohorts.

| Category | Measurement name |
| --- | --- |
| HFNC | High Flow Nasal Cannula  High Flow Mask  Heated High Flow Blender  Neb High Flow  Head Hood;High Flow Nasal Cannula  Aerosol mask;High Flow Mask  Oxyhood;Heated High Flow blender  High Flow Mask;Heated High Flow Blender  High Flow Nasal Cannula;Heated High Flow Blender  Aerosol Mask;Neb High Flow  Simple mask;Heated High Flow Blender  Heated High Flow Blender;Other (Comment)  Heated High Flow Blender;High Flow Nasal Cannula  Non-rebreather mask;Heated High Flow Blender  Heated High Flow Blender;Neb High Flow  Heated High Flow Blender;NC  Heated High Flow Blender;Head Hood  Heated High Flow Blender;Non-rebreather mask  Neb High Flow;Aerosol Mask  Venturi Mask;Heated high Flow Blender  Heated High Flow Blender;High Flow Mask  Heated High Flow Blender; heated High Flow Blender |
| NIV | BIPAP  CPAP  Bag Valve Mask |

Supplementary Table 3. Model features summary.

| **Demographic features** | Age, Gender, care unit identifier - ED, care unit identifier- Ward, hours between hospital admit and care unit admit (ED/Ward), duration from care unit admission until current time |
| --- | --- |
|  |  |
| **Vital signs and laboratory measurements** | HR, O2Sat, Temp, SBP, MAP, DBP, Resp, EtCO2, BaseExcess, HCO3, FiO2, pH, PaCO2, SaO2, AST, BUN, Alkalinephos, Calcium, Chloride, Creatinine, BilirubinDirect, Glucose, Lactate, Magnesium, Phosphate, Potassium, BilirubinTotal, TroponinI, Hct, Hgb, PTT, WBC, Fibrinogen, Platelets, PaO2, BNP, Sodium, Procalcitonin, CRP, Ammonia, Hgb_A1C, lymphocytes, lymphocytes_differential, albumin, ALT, D_Dimer, Ferritin, Red_cell_width, Sedimentation_Rate, LDH |
| **Comorbidities** | Disseminated intravascular coagulation, Necrotizing Fasciitis, Tumor Lysis Syndrome, Shock, Metastatic Cancer, STEMI, Myeloblastic Leukemia, Liver Failure, Malignant Pleural Effusion, Pneumothorax, Cachexia, Coma, Peritonitis, Lymphoma, Endocarditis, Myocarditis, Pericarditis, Septic Embolism, Coagulation Defect, Primary Lung Cancer, Lymphoid Leukemia, Pericardial Effusion, Cerebral Infarction, Meningitis/Encephalitis, Malignant Liver Cancer, GI Hemorrhage, Acute Renal Failure, Chronic Liver Disease, Neutropenia, Cardiac Arrhythmia, Malnutrition, Pulmonary Heart Disease, Chronic Kidney Disease, Plasma Protein Disorder, Pancytopenia/Aplasia, Aspiration Pneumonitis, AMI/Non-STEMI, CHF, Encephalopathy, Thrombocytopenia Including Purpuric, HIT, & Other Platelet defects, Coronary artery disease, COPD, Diabetes, HIV, Hypertension, Obesity, Severe Brain Conditions, Other Pulmonary Conditions, Non-Rheumatic Valve Disease, UTI, Anemia, Pneumonia, Hyperlipidemia, Major depressive disorder, Bacterimia, Gastro-esophageal reflux disease, Hypothyroidism, Long term use of insulin, Liver cirrhosis, Immune conditions, Solid malignancy, Organ transplant, Rheumatologic/Inflammatory |
| **Medications** | Anesthesia, Anticoagulants, Anticonvulsants, Antipsychotics, Bleeding reversal agents, Continuous infusion vasodilator, Continuous infusion anti-hypertensive, Continuous infusion antiarrhythmics, Inhaled prostacyclin, Continuous infusion for neuromuscular blockade, Continuous infusion for pain, Steroids |

Supplementary Table 4. Comparison of missing data in two ICU cohorts.

| **Feature** | **UCSD (%)** | **UCI (%)** |
| --- | --- | --- |
| HR | 0.004 | 0.002 |
| O2Sat | 0.02 | 0.003 |
| Temp | 0.25 | 0.05 |
| SBP | 5.05 | 0.08 |
| MAP | 5.28 | 0.11 |
| DBP | 5.05 | 0.08 |
| Resp | 0.11 | 0.06 |
| EtCO2 | 89.91 | 97.36 |
| BaseExcess | 83.08 | 78.46 |
| HCO3 | 6.12 | 100.00 |
| FiO2 | 88.90 | 82.60 |
| pH | 82.88 | 90.94 |
| PaCO2 | 83.19 | 91.08 |
| SaO2 | 83.46 | 81.23 |
| AST | 53.55 | 47.36 |
| BUN | 5.97 | 12.30 |
| Alkalinephos | 53.50 | 47.10 |
| Calcium | 5.97 | 12.30 |
| Chloride | 5.99 | 12.37 |
| Creatinine | 6.02 | 12.49 |
| BilirubinDirect | 85.50 | 70.21 |
| Glucose | 5.96 | 12.37 |
| Lactate | 75.37 | 66.80 |
| Magnesium | 19.10 | 17.75 |
| Phosphate | 24.69 | 21.10 |
| Potassium | 5.78 | 12.43 |
| BilirubinTotal | 54.33 | 47.23 |
| TroponinI | 84.94 | 100.00 |
| Hct | 7.91 | 13.44 |
| Hgb | 7.21 | 13.44 |
| PTT | 57.02 | 66.22 |
| WBC | 8.10 | 13.62 |
| Fibrinogen | 94.40 | 94.04 |
| Platelets | 8.08 | 13.77 |
| PaO2 | 83.08 | 91.02 |
| BNP | 94.51 | 100.00 |
| Sodium | 6.45 | 18.85 |
| Procalcitonin | 92.67 | 91.28 |
| CRP | 99.72 | 93.35 |
| Ammonia | 97.67 | 96.25 |
| Hgb_A1C | 89.93 | 89.94 |
| lymphocytes | 20.19 | 100.00 |
| lymphocytes_differential | 19.19 | 43.28 |
| albumin | 52.13 | 47.99 |
| ALT | 54.87 | 48.98 |
| D_Dimer | 98.31 | 96.39 |
| Ferritin | 98.01 | 94.33 |
| Red_cell_width | 8.10 | 13.49 |
| Sedimentation_Rate | 97.57 | 95.16 |
| LDH | 93.56 | 93.69 |

Supplementary 5: The Vent.io pretraining process.

The architecture of Vent.io was described in Supplementary Figure 1. For pretraining Vent.io UCSD ICU cohort was randomly split into 80% for training and 20% for validation. We employed Bayesian optimization on the training set to fine-tune hyperparameters, including learning rate, hidden layers, dropout rate, and weight decay. The model was trained using the fine-tuned hyperparameters, with early stopping applied to prevent overfitting by selecting the best checkpoint based on validation performance. The threshold was selected to achieve a sensitivity of 0.6 in the training set. On the validation set, using this threshold, the pretrained Vent.io achieved an AUC of 0.882, sensitivity of 0.588, specificity of 0.841, and positive predictive value of 0.170, demonstrating robust performance in predicting IMV need within 24 hours.


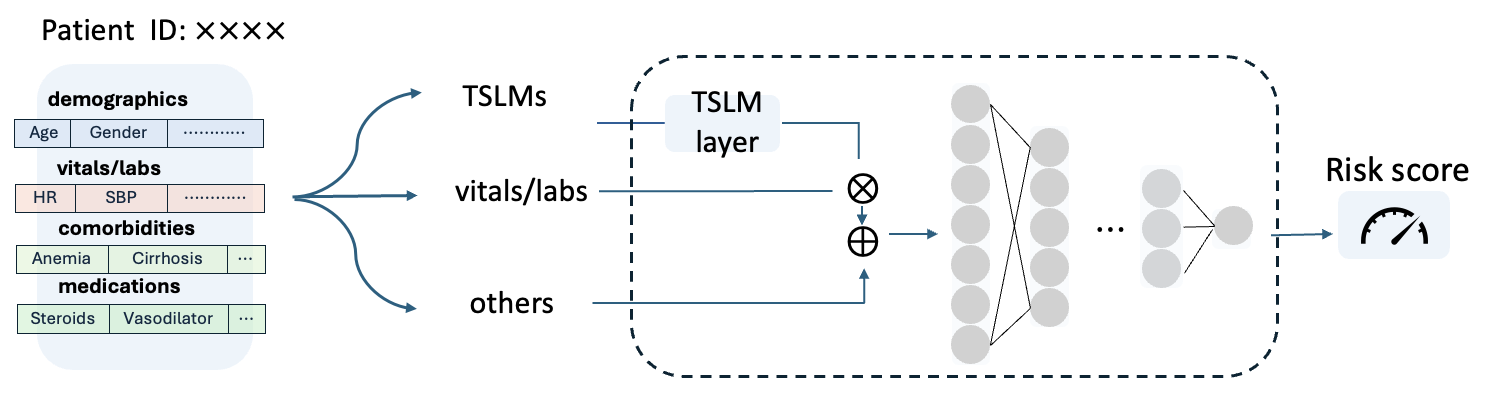


Figure 1. Vent.io architecture, including a weighted layer (TSLM layer) for adjusting the importance of labs and vitals, followed by the feedforward neural network.

Supplementary Table 5. Patient characteristics for UCSD and UCI ICU cohorts.

| Variable | UCSD | | UCI | |
| --- | --- | --- | --- | --- |
| Control group | Positive group | Control group | Positive group |
| Encounters, N (%) | 29544(94.8) | 1636(5.2) | 3110(94.5) | 180(5.5) |
| Age (years), Median (IQR) | 62.2(49.1-73.2) | 61.9(50.3-71.9) | 61.4(44.9-72.7) | 63.0(51.8-73.7) |
| Gender, % |  |  |  |  |
| Male | 41.7 | 37.3 | 43.2 | 42.8 |
| Per Visit ICU Length of Stay (hours), Median (IQR) | 46.6(29.4-75.6) | 141.4(66.3-250.7) | 50.8(31.9-86.7) | 126.6(56.8-256.5) |
| CCI, Median (IQR) | 2.0(1.0-4.0) | 2.0(1.0-4.0) | 1.0(0.0-3.0) | 2.0(1.0-5.0) |
| SOFA, Median (IQR) | 2.0(1.0-4.0) | 9.0(7.0-12.0) | 2.0(1.0-3.0) | 10.0(6.0-12.0) |
| Mortality, % | 5.7 | 38.8 | 3.3 | 22.2 |
| Time from ICU admission to initiation of MV (hours), Median (IQR) | - | 26.9(11.0-58.0) | - | 28.0(11.0-57.0) |
